# Supplementary material for: Understanding the influence of “hot” models in climate impact studies: a hydrological perspective
Source: Copernicus journal article supplement (doi:10.5194/hess-27-4355-2023), 2023-12-11
Supplement: Supplementary file 1 [file hess-27-4355-2023-supplement.pdf]

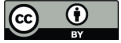

*Supplement of*

## **Understanding the influence of “hot” models in climate impact studies: a hydrological perspective**

**Mehrad Rahimpour Asenjan et al.**

*Correspondence to:* Mehrad Rahimpour Asenjan ([mehrad.rahimpour-asenjan.1@ens.etsmtl.ca](mailto:mehrad.rahimpour-asenjan.1@ens.etsmtl.ca))

The copyright of individual parts of the supplement might differ from the article licence.

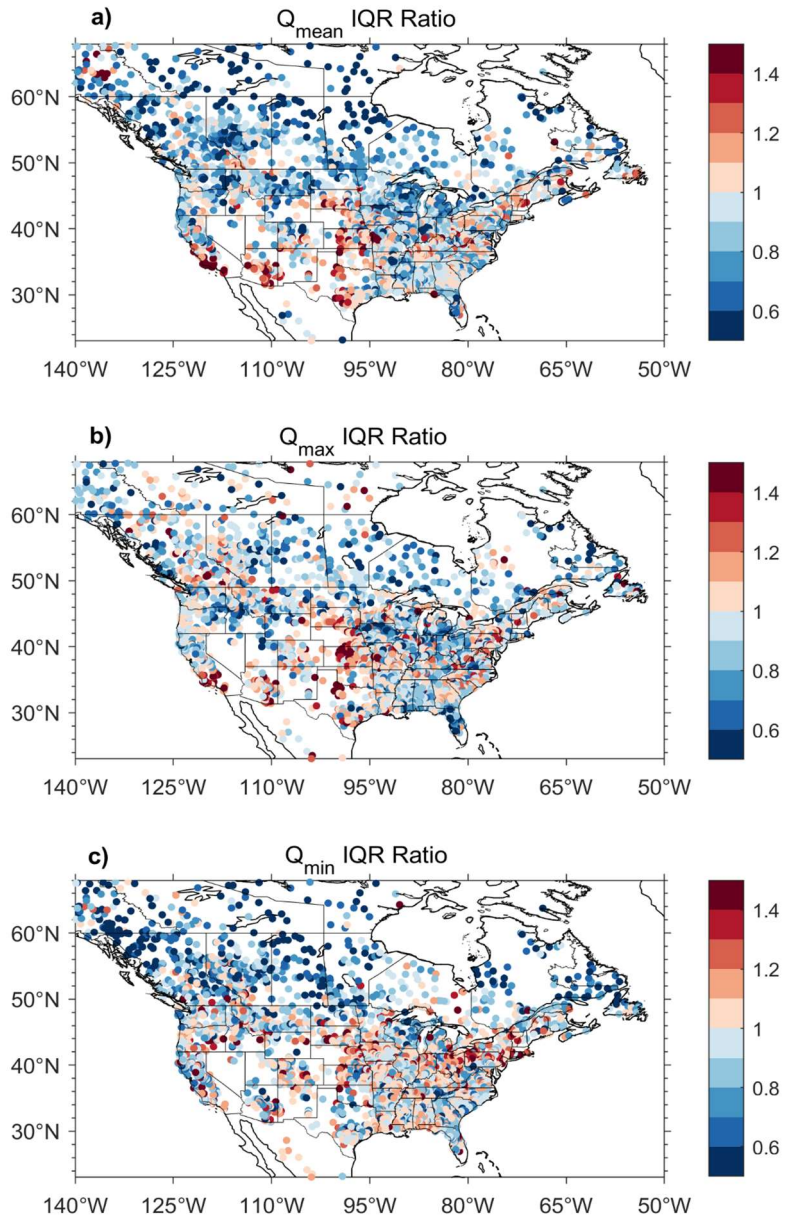

Figure S1. Change in the IQR ratio for  $Q_{\text{mean}}$  (a),  $Q_{\text{max}}$  (b), and  $Q_{\text{min}}$  (c) resulting from the removal of the five hot models.

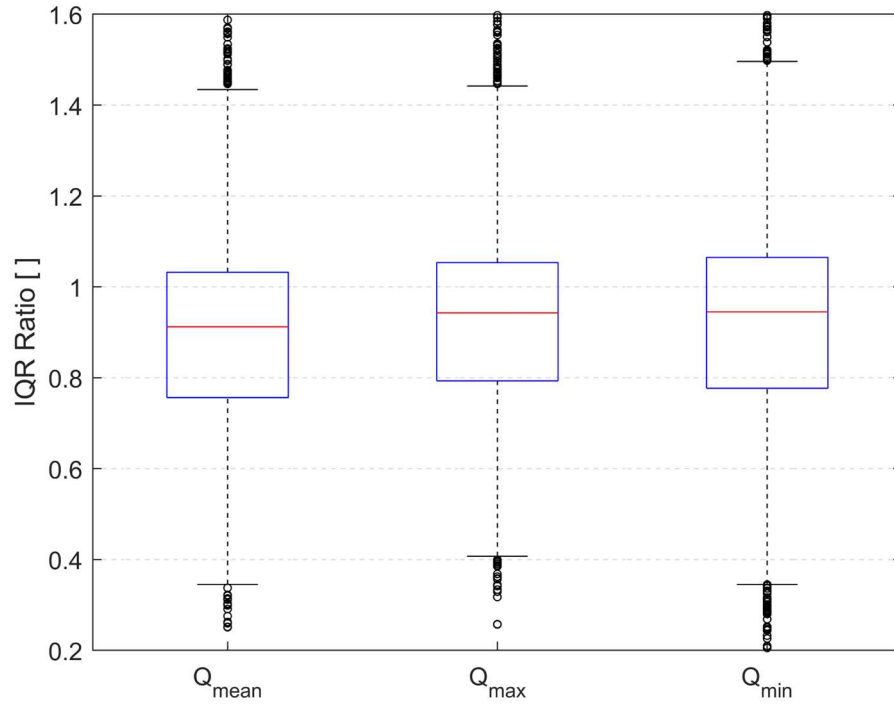

**Figure S2. Boxplots of change in the interquartile range ratio ( $IQR_{nd}$ ) for  $Q_{mean}$ ,  $Q_{max}$  and  $Q_{min}$  resulting from the removal of the 5 hot models. A few outliers are beyond the Y-axis limits.**

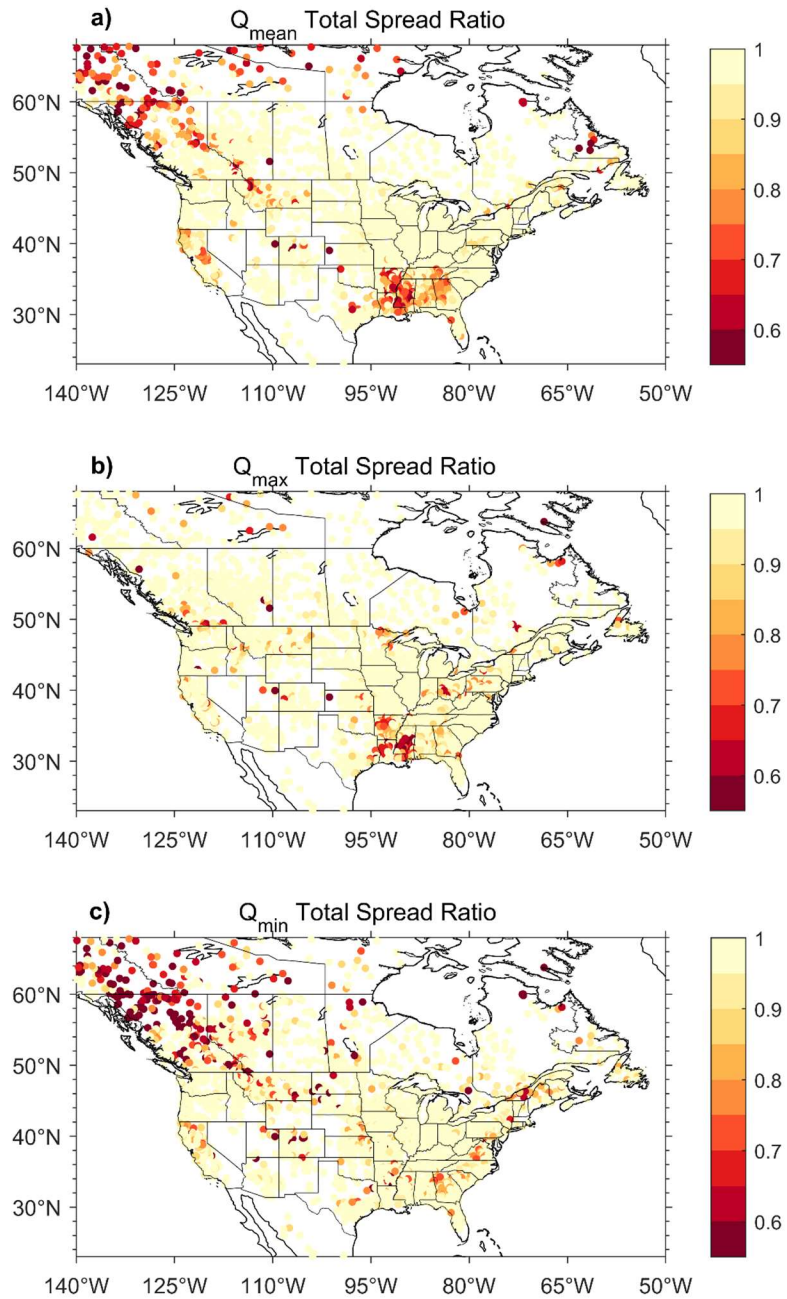

Figure S3. Total spread ratio for  $Q_{\text{mean}}$  (a),  $Q_{\text{max}}$  (b), and  $Q_{\text{min}}$  (c) resulting from the removal of a single climate model (CanESM5).

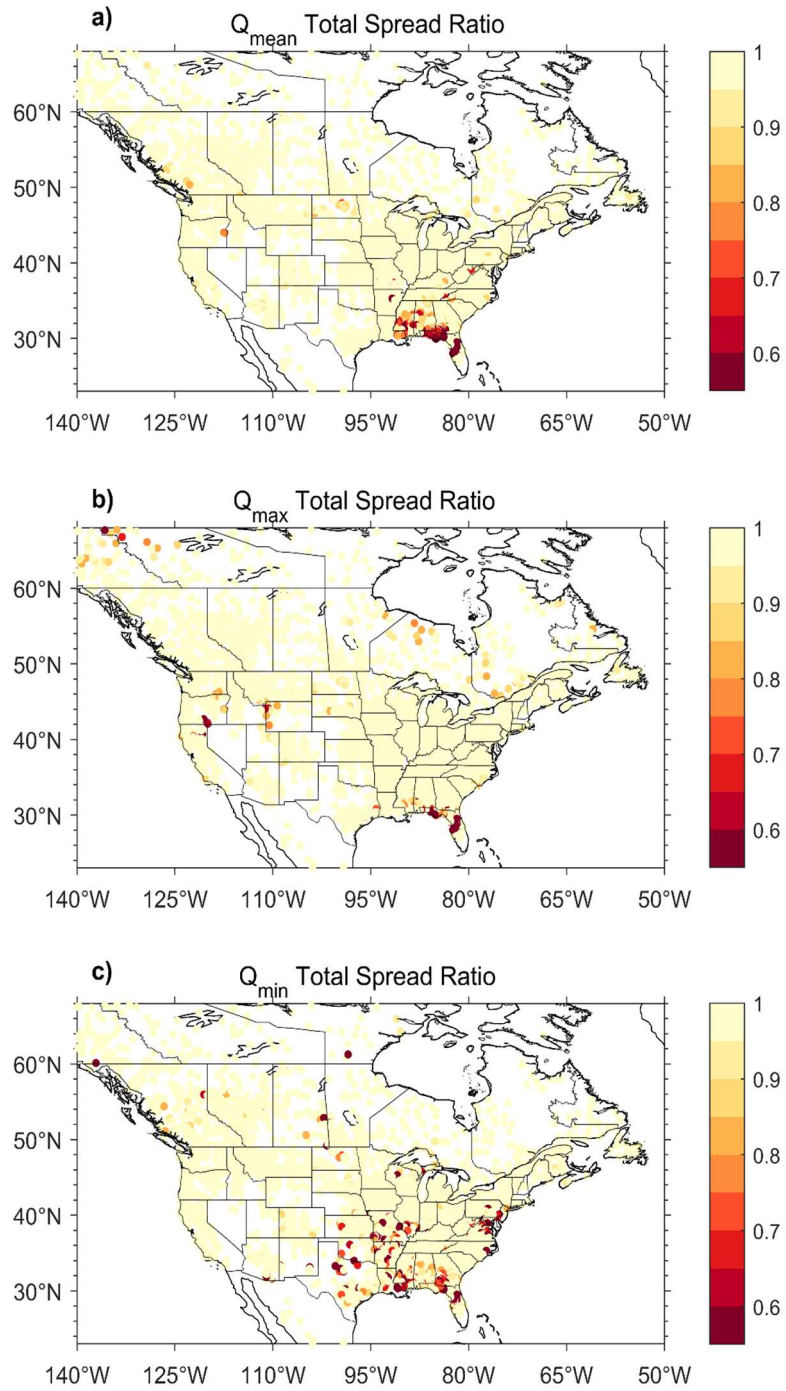

Figure S4. Total spread ratio for  $Q_{\text{mean}}$  (a),  $Q_{\text{max}}$  (b), and  $Q_{\text{min}}$  (c) resulting from the removal of a single climate model (NESM3).
